# Supplementary material for: Exploring lithium ion interactions in graphite electrodes through non-equilibrium molecular dynamics and density functional theory
Source: Royal Society of Chemistry journal article supplement (doi:10.1039/d4cp02877e), 2024-01-01
Supplement: d4cp02877e1.pdf [file d4cp02877e1.pdf]

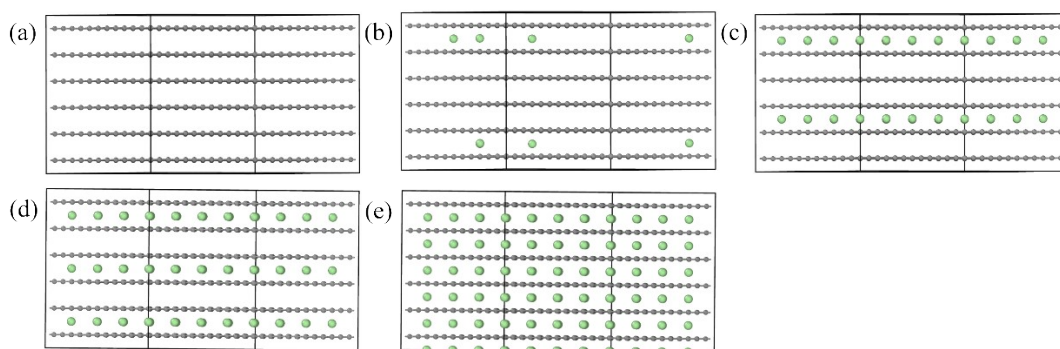

Figure S1 (a) , (b) , (c) , (d) and (e) are respectively the simulated initial models of  $\text{Li}_x\text{C}_6$  ( $X=0.02-1$ ).

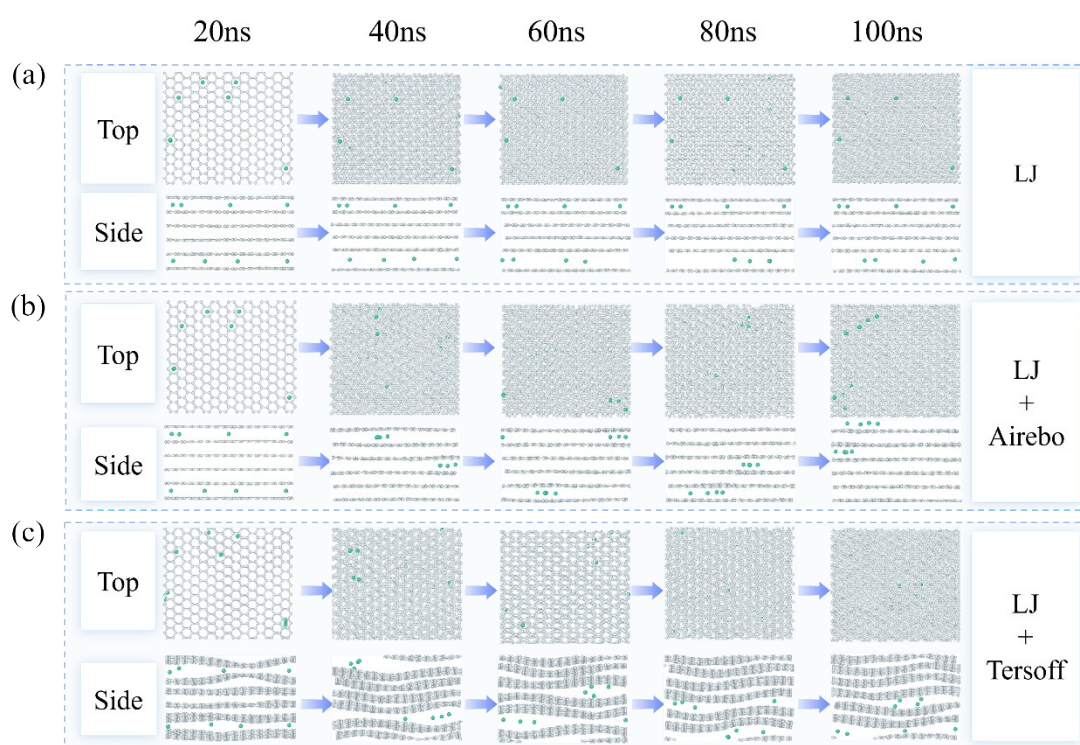

Figure S2 MD simulations of the top and side views of the  $\text{Li}_{0.02}\text{C}_6$  model were carried out within 100ns. During the simulations, (a) the LJ potential function, (b) the Airebo potential function and (c) the Tersoff potential function describe the interaction of C-C bonds between graphite layers. where grey represents carbon atoms and green represents lithium atoms.

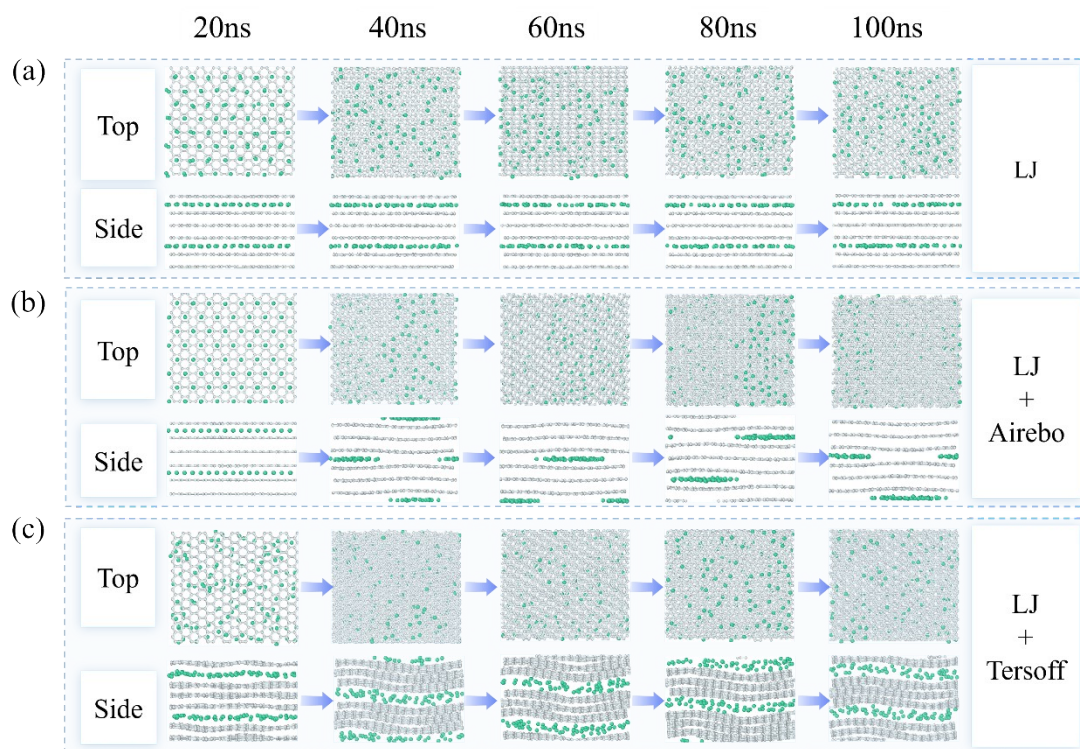

Figure S3 MD simulations of the top and side views of the  $\text{Li}_{0.33}\text{C}_6$  model were carried out within 100ns. During the simulations, (a) the LJ potential function, (b) the Airebo potential function and (c) the Tersoff potential function describe the interaction of C-C bonds between graphite layers, where grey represents carbon atoms and green represents lithium atoms.

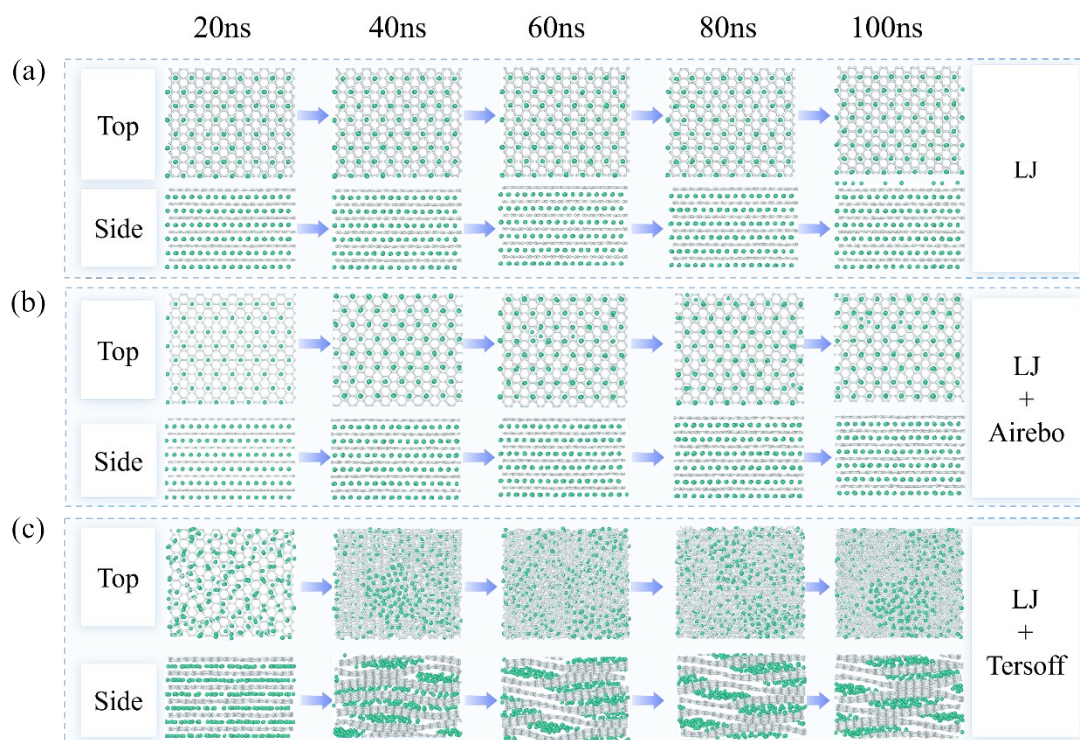

Figure S4 MD simulations of the top and side views of the  $\text{Li}_{0.5}\text{C}_6$  model were carried out within 100ns. During the simulations, (a) the LJ potential function, (b) the Airebo potential function and (c) the Tersoff potential function

describe the interaction of C-C bonds between graphite layers. where grey represents carbon atoms and green represents lithium atoms.

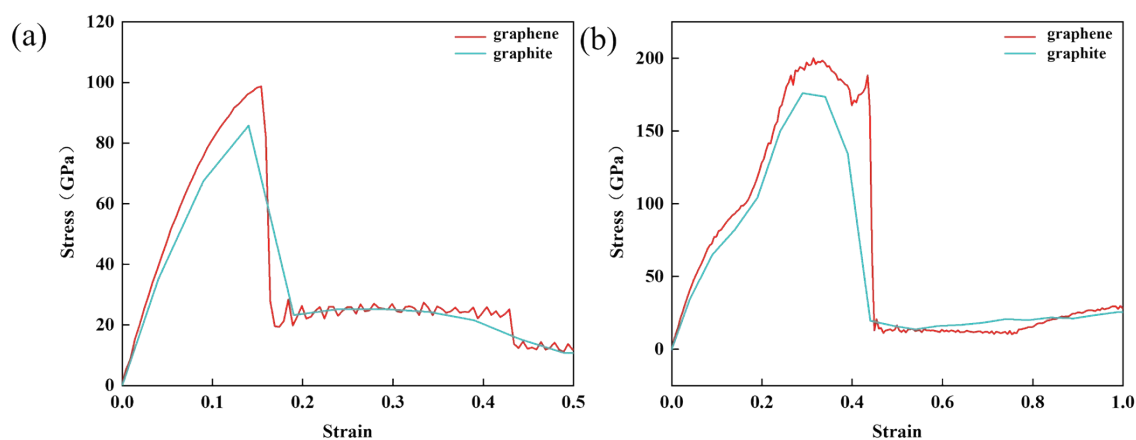

Figure S5 The stress-strain curves of graphene with different layers: (a) Represents the stress-strain curves of monolayer graphene and six-layer graphite obtained using the AIREBO potential function. (b) Represents the stress-strain curves of monolayer graphene and six-layer graphite obtained using the Tersoff potential function.

Table S1

| Diffusion Coefficients of Lithium ions ( cm <sup>2</sup> /sec) |                            |                            |                                                   |                         |
|----------------------------------------------------------------|----------------------------|----------------------------|---------------------------------------------------|-------------------------|
|                                                                | This Work                  |                            | MC <sup>1</sup>                                   | DFT <sup>2</sup>        |
|                                                                | Airebo                     | Tersoff                    |                                                   |                         |
| Li <sub>0.02</sub> C <sub>6</sub>                              | 1.3955 × 10 <sup>-6</sup>  | 4.95167 × 10 <sup>-6</sup> | /                                                 | /                       |
| Li <sub>0.2</sub> C <sub>6</sub>                               | /                          | /                          | 1.43 × 10 <sup>-8</sup>                           | 7.04 × 10 <sup>-6</sup> |
| Li <sub>0.33</sub> C <sub>6</sub>                              | 6.66 × 10 <sup>-7</sup>    | 3.63833 × 10 <sup>-6</sup> | 1.40 × 10 <sup>-8</sup> ~                         | 6.71 × 10 <sup>-6</sup> |
| Li <sub>0.5</sub> C <sub>6</sub>                               | 3.26075 × 10 <sup>-8</sup> | 3.22202 × 10 <sup>-6</sup> | 7.74 × 10 <sup>-12</sup> ~7.59 × 10 <sup>-9</sup> | 6.66 × 10 <sup>-6</sup> |
| LiC <sub>6</sub>                                               | 3.98 × 10 <sup>-9</sup>    | 8.53 × 10 <sup>-7</sup>    | 7.70 × 10 <sup>-10</sup>                          | 6.83 × 10 <sup>-6</sup> |

<sup>1</sup> Persson K, Sethuraman V A, Hardwick L J, et al. Lithium diffusion in graphitic carbon[J]. The journal of physical chemistry letters, 2010, 1(8): 1176-1180.

<sup>2</sup> Kresse, G. Furthmuller, Efficiency of Ab-Initio Total Energy Calculations for Metals and Semiconductors Using a PlaneWave Basis Set. J. Comput. Mater. Sci. 1996, 6, 15-50.
